# Supplementary material for: Quality Characteristics of White Leaf Tea of ‘Baiye 1’ (Camellia sinensis) in Different Producing Areas
Source: MDPI journal article supplement (doi:10.3390/agronomy13102526), 2023-09-29
Supplement: s1 [file s1]

**Table S1.** Detailed information of green tea samples in the study. Temperature, precipitation, sunshine and humidity were estimated from October of last year to February of this year.

| Location      | Sample Number | Harvest year | Harvest season | Temperature (°C) | Precipitation (mm) | Sunshine (W/m <sup>2</sup> ) | Humidity (%) |
|---------------|---------------|--------------|----------------|------------------|--------------------|------------------------------|--------------|
| Anji (AJ)     | 29            | 2021         | Spring         | 25.53            | 47.46              | 70.10                        | 81.98        |
|               |               | 2022         | Spring         | 18.17            | 59.62              | 72.68                        | 83.32        |
| Songyang (SY) | 20            | 2021         | Spring         | 25.14            | 32.70              | 78.45                        | 82.75        |
|               |               | 2022         | Spring         | 18.12            | 77.28              | 80.49                        | 84.65        |
| Hubei (HB)    | 25            | 2021         | Spring         | 19.97            | 63.28              | 69.56                        | 83.38        |
|               |               | 2022         | Spring         | 16.58            | 43.95              | 74.59                        | 82.56        |
| Guizhou (GZ)  | 20            | 2021         | Spring         | 20.37            | 40.08              | 72.46                        | 86.23        |
|               |               | 2022         | Spring         | 16.58            | 43.95              | 85.88                        | 76.35        |

**Table S2.** Correlation analysis between soil factors and biochemical composition of tea samples. A<sub>Ca</sub> is referred to available Ca, A<sub>K</sub> is referred to available K, A<sub>Mg</sub> is referred to available Mg, and A<sub>P</sub> is referred to available P. \* and \*\* respectively represent significant difference at the p = 0.05 and p = 0.01 confidence level.

|      | pH       | A <sub>Ca</sub> | A <sub>K</sub> | A <sub>Mg</sub> | A <sub>P</sub> |
|------|----------|-----------------|----------------|-----------------|----------------|
| GA   | 0.261*   | 0.201           | -0.08          | 0.084           | -.251*         |
| GC   | 0.035    | -0.105          | -0.123         | 0.009           | 0.082          |
| C    | -0.057   | -0.18           | -0.169         | -0.097          | -0.168         |
| ECG  | -0.376** | -.318**         | -0.043         | -0.188          | 0.292**        |
| EGCG | 0.146    | -0.072          | -0.035         | -0.069          | -.321**        |
| EGC  | 0.11     | -0.086          | -0.196         | 0.004           | -0.13          |
| CAF  | 0.201    | 0.031           | 0.001          | -0.011          | -.352**        |
| GCG  | -0.001   | -0.101          | -.312**        | -0.101          | -.206*         |
| EC   | -0.104   | -0.121          | -0.03          | -0.012          | 0.041          |
| His  | 0.029    | 0.034           | -0.024         | -0.041          | -0.148         |
| Ser  | 0.077    | 0.001           | -0.03          | -0.068          | -.307**        |
| Gln  | 0.061    | -0.006          | 0              | -0.064          | -.225*         |
| Arg  | 0.018    | 0.063           | -0.127         | 0.009           | -0.193         |
| Gly  | -0.22    | -0.158          | -0.115         | -0.156          | -0.08          |
| Asp  | 0.201    | 0.154           | -0.073         | 0.048           | -.295**        |
| Glu  | 0.046    | 0.035           | -0.043         | -0.004          | -.358**        |
| Thr  | 0.2      | 0.027           | -0.035         | -0.063          | -.307**        |
| Ala  | 0.159    | 0.098           | -0.06          | 0.014           | -.416**        |
| GABA | -0.362** | -.219*          | 0.006          | -0.184          | 0.168          |
| Eth  | -0.093   | -0.073          | -0.117         | -0.038          | -.297**        |

|      |          |        |        |        |         |
|------|----------|--------|--------|--------|---------|
| Thea | 0.061    | 0.016  | -0.018 | -0.051 | -.332** |
| Pro  | -0.039   | -0.126 | -0.016 | -0.167 | -0.135  |
| Cys  | -0.343** | -.217* | -0.087 | -0.187 | 0.178   |
| Lys  | -0.116   | -0.161 | -0.101 | -0.159 | -0.015  |
| Tyr  | -0.112   | -0.155 | -0.011 | -0.176 | -0.033  |
| Met  | -0.023   | -0.022 | -0.075 | -0.009 | 0.101   |
| Val  | 0.017    | -0.053 | -0.067 | -0.107 | -0.154  |
| Ile  | 0.078    | -0.043 | -0.057 | -0.118 | -0.185  |
| Leu  | 0.058    | -0.06  | -0.065 | -0.124 | -0.142  |
| Phe  | 0.051    | -0.06  | -0.059 | -0.112 | -0.063  |

**Table S3.** Correlation analysis between soil factors and mineral elements of tea. \* and \*\* respectively represent significant difference at the p = 0.05 and p = 0.01 confidence level.

|    | pH      | ACa    | AK     | AMg    | AP      |
|----|---------|--------|--------|--------|---------|
| Al | -0.116  | 0.096  | -0.024 | 0.136  | 0.12    |
| B  | .325**  | .236*  | 0.123  | 0.154  | -.301** |
| Ba | .346**  | .415** | -.215* | .406** | -0.005  |
| Ca | .455**  | .447** | -0.002 | .358** | -0.124  |
| Cd | -.268** | -0.043 | 0      | -0.098 | 0.184   |
| Co | -0.195  | -0.064 | 0.12   | -0.049 | 0.039   |
| Cr | .335**  | .464** | -0.081 | .326** | 0.019   |
| Cu | 0.115   | 0.198  | -0.144 | 0.189  | 0.014   |
| Fe | .581**  | .550** | -0.043 | .394** | -.354** |
| K  | -0.075  | 0.013  | -0.051 | 0.011  | 0.097   |
| Mg | .315**  | .286** | 0.021  | .255*  | -0.146  |
| Mn | -0.145  | -0.019 | 0.062  | -0.062 | 0.008   |
| Na | -0.074  | 0.038  | 0.111  | -0.026 | 0.057   |
| Ni | 0.18    | .297** | -0.147 | .249*  | -.209*  |
| P  | -0.067  | 0.01   | 0.134  | -0.056 | 0.141   |
| S  | 0.092   | .222*  | -0.099 | 0.084  | -0.104  |
| Ti | .343**  | .603** | 0.019  | .489** | 0.031   |
| V  | -.423** | -0.203 | -0.002 | -0.132 | .331**  |
| Zn | 0.13    | 0.095  | -0.048 | 0.043  | -0.004  |
| Sn | -0.018  | 0.119  | .277** | .234*  | .307**  |
| Sb | -.329** | -0.127 | 0.06   | -0.062 | .222*   |
| Bi | .246*   | 0.184  | 0.058  | 0.055  | -0.086  |

**Table S4.** Correlations analysis between stable isotopes with meteorological factors. RHM is referred to relative humidity, TMR is referred to mean temperature, PRS is referred to precipitation, and CSP is referred to sunshine. \* and \*\* respectively represent significant difference at the p = 0.05 and p = 0.01 confidence level.

|                       | RHM    | TMR    | PRS    | CSP    |
|-----------------------|--------|--------|--------|--------|
| $\delta^{15}\text{N}$ | -0.165 | -0.149 | -0.151 | -0.012 |

|                       |        |         |         |         |
|-----------------------|--------|---------|---------|---------|
| $\delta^{13}\text{C}$ | -0.12  | .580**  | -.490** | -.426** |
| $\delta^{18}\text{O}$ | -0.109 | -.541** | .435**  | .443**  |

**Table S5.** Predictive abilities of the partial least squares discriminant analysis and orthogonal projections to latent structures-discriminant analysis models in discriminating different counties of WLT.

|             |              |                | ZJAJ | ZJSY | accuracy |
|-------------|--------------|----------------|------|------|----------|
| PLS-<br>DA  | Training set | ZJAJ           | 22   | 0    | 100%     |
|             |              | ZJSY           | 1    | 15   | 93.75%   |
|             |              | Total accuracy |      |      | 97.37%   |
|             | Testing set  | ZJAJ           | 6    |      | 100%     |
|             |              | ZJSY           | 1    | 3    | 75%      |
|             |              | Total accuracy |      |      | 90%      |
| OPLS-<br>DA | Training set | ZJAJ           | 22   | 0    | 100%     |
|             |              | ZJSY           | 0    | 16   | 100%     |
|             |              | Total accuracy |      |      | 100%     |
|             | Testing set  | ZJAJ           | 5    | 1    | 83.33%   |
|             |              | ZJSY           | 1    | 3    | 75%      |
|             |              | Total accuracy |      |      | 80%      |

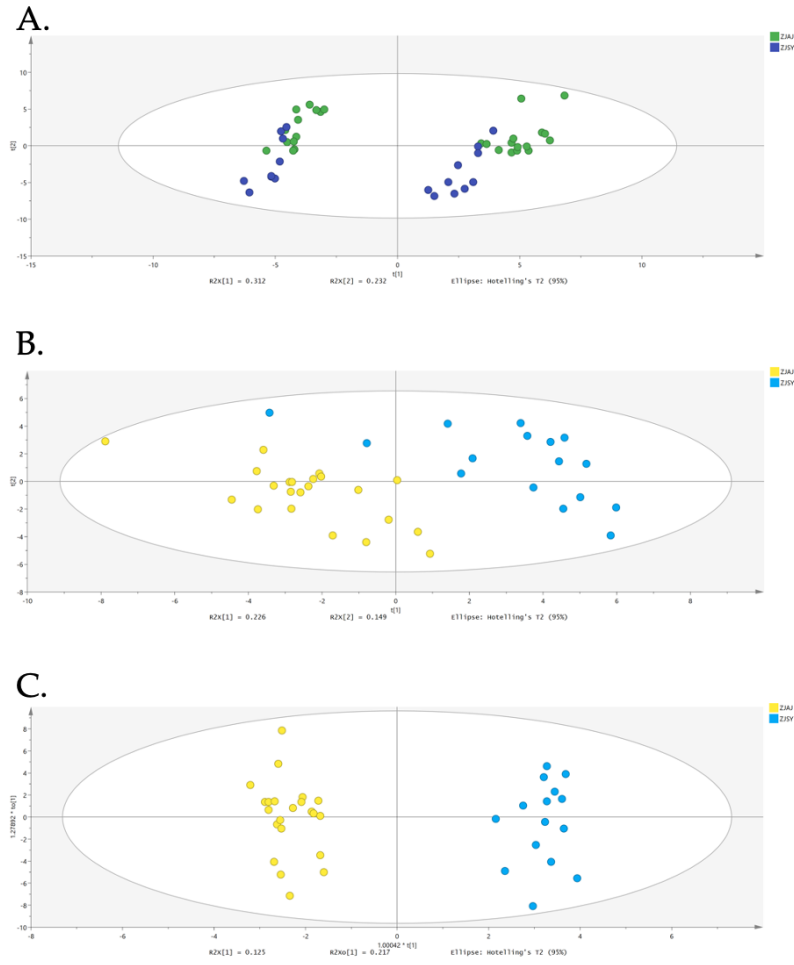

**Figure S1.** Analysis on differential white leaf tea origin classification. (A) Principal component analysis score plot for two counties; (B) partial least squares discriminant analysis score plot for two counties; (C) orthogonal projections to latent structures-discriminant analysis score plot for two counties.

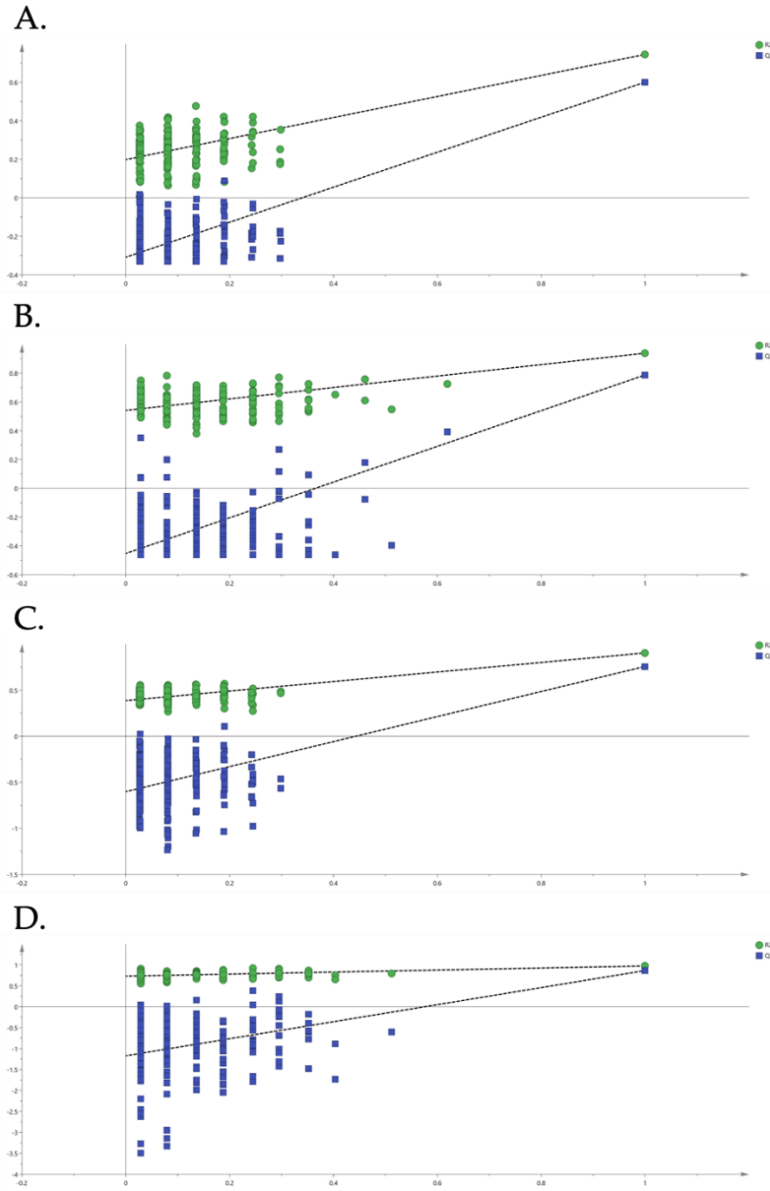

**Figure S2.** Permutation tests of the partial least squares discriminant analysis models for three provinces (A), and two counties in Zhejiang province(B), the orthogonal projections to latent structures-discriminant analysis models for three provinces (C), and two counties in Zhejiang province (D). The blue regression line of the Q2-points intersects the vertical axis (on the left) below zero, indicates that the original model is valid.

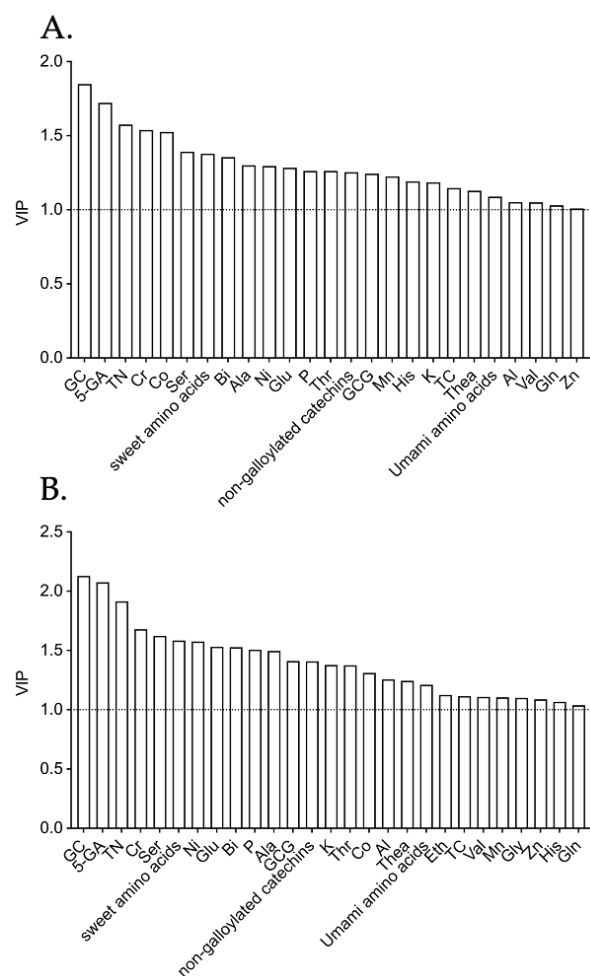

**Figure S3.** Variable importance plots for (A) partial least squares discriminant analysis model; (B) orthogonal projections to latent structures-discriminant analysis model in discriminating different counties of WLT.
